# Supplementary material for: Steric and electric field driven distortions in aromatic molecules: spontaneous and non-spontaneous symmetry breaking
Source: Royal Society of Chemistry journal article supplement (doi:10.1039/c6cp05237a), 2016-01-01
Supplement: c6cp05237a1.pdf [file c6cp05237a1.pdf]

## Supporting Information

### **Steric and Electric Field Driven Distortions in Aromatic Molecules: Spontaneous and Non-Spontaneous Symmetry Breaking**

Kalishankar Bhattacharyya<sup>1</sup>, Ammu Surendran<sup>2</sup>, Chandra Chowdhury<sup>1</sup> and Ayan Datta<sup>1\*</sup>

<sup>1</sup>*Department of Spectroscopy, Indian Association for the Cultivation of Science, 2A and 2B Raja S.C. Mullick Road, Jadavpur-700032, Kolkata, West Bengal, India.*

<sup>2</sup>*Department of Chemistry, Cochin University of Science and Technology (CUSAT), Cochin - 682022, Kerala, India.*

### Contents

1. Cartesian coordinates for optimized structures of TBP (**1**), benzene (**2**) and Coronene (**3**) and their energies in Hartree and low frequencies calculated at B3LYP/6-31+G(d,p) level of theory. All calculations have been performed in gas-phase.
2. TD-DFT results TBP (**1**), Benzene (**2**) and Coronene (**3**) at B3LYP/6-31+G(D,P) level of theory.

---

1. Cartesian coordinates for optimized structures of (a) TBP (**1**), (b) Benzene (**2**) and (c) Coronene (**3**) and their energies in Hartree and low frequencies calculated at B3LYP/6-31+G(d,p) level of theory.

#### **(a) Tribenzopyrene (TBP, 1)**

| <b>Atom</b> | <b>X</b>   | <b>Y</b>   | <b>Z</b>    |
|-------------|------------|------------|-------------|
| C           | 0.00000000 | 2.76756200 | -2.26019010 |
| C           | 0.00000000 | 1.39795800 | -2.18192210 |
| C           | 0.00000000 | 0.67125200 | -3.42478810 |
| H           | 0.00000000 | 1.24240900 | -4.34860510 |

|   |             |             |             |
|---|-------------|-------------|-------------|
| C | 0.00000000  | -0.67125200 | -3.42478810 |
| H | 0.00000000  | -1.24240900 | -4.34860510 |
| C | 0.00000000  | -1.39795800 | -2.18192210 |
| C | 0.00000000  | -2.76756200 | -2.26019010 |
| C | 0.00000000  | -3.57922400 | -1.11712510 |
| C | 0.00000000  | -4.98791900 | -1.32439010 |
| H | 0.00000000  | -5.34458100 | -2.35091010 |
| C | 0.00000000  | -5.87116400 | -0.27560510 |
| H | 0.00000000  | -6.94444000 | -0.43859610 |
| C | 0.00000000  | -5.33197200 | 1.02341390  |
| H | 0.00000000  | -5.99204400 | 1.88612190  |
| C | 0.00000000  | -3.96630900 | 1.24230790  |
| H | 0.00000000  | -3.71396300 | 2.28139390  |
| C | 0.00000000  | -2.98390900 | 0.19711690  |
| C | 0.00000000  | -1.50409800 | 0.30525790  |
| C | 0.00000000  | -0.72413100 | 1.55729490  |
| C | 0.00000000  | -1.35228100 | 2.83073090  |
| H | 0.00000000  | -2.41340700 | 2.89959790  |
| C | 0.00000000  | -0.69567500 | 4.04405690  |
| H | 0.00000000  | -1.26724400 | 4.96738090  |
| C | -0.00000000 | 0.69567500  | 4.04405690  |
| H | -0.00000000 | 1.26724400  | 4.96738090  |
| C | -0.00000000 | 1.35228100  | 2.83073090  |
| H | -0.00000000 | 2.41340700  | 2.89959790  |
| C | -0.00000000 | 0.72413100  | 1.55729490  |
| C | -0.00000000 | 1.50409800  | 0.30525790  |

|   |             |             |             |
|---|-------------|-------------|-------------|
| C | -0.00000000 | 2.98390900  | 0.19711690  |
| C | -0.00000000 | 3.96630900  | 1.24230790  |
| H | -0.00000000 | 3.71396300  | 2.28139390  |
| C | -0.00000000 | 5.33197200  | 1.02341390  |
| H | -0.00000000 | 5.99204400  | 1.88612190  |
| C | -0.00000000 | 5.87116400  | -0.27560510 |
| H | -0.00000000 | 6.94444000  | -0.43859610 |
| C | -0.00000000 | 4.98791900  | -1.32439010 |
| H | -0.00000000 | 5.34458100  | -2.35091010 |
| C | -0.00000000 | 3.57922400  | -1.11712510 |
| C | 0.00000000  | -0.73149000 | -0.89252110 |
| C | -0.00000000 | 0.73149000  | -0.89252110 |
| H | 0.00000000  | -3.24146800 | -3.23820910 |
| H | -0.00000000 | 3.24146800  | -3.23820910 |

Energy = -1225.9649232 Hartree

Low Frequencies (cm<sup>-1</sup>): -267.392 -238.248 -31.366 26.700 99.229 120.027

**(b) Benzene (2)**

| Atom | X         | Y         | Z        |
|------|-----------|-----------|----------|
| C    | 0.000000  | 1.396223  | 0.000000 |
| C    | -1.209113 | 0.698096  | 0.000000 |
| C    | -1.209113 | -0.698096 | 0.000000 |
| C    | 0.000000  | -1.396223 | 0.000000 |
| C    | 1.209113  | -0.698096 | 0.000000 |

|   |           |           |          |
|---|-----------|-----------|----------|
| C | 1.209113  | 0.698096  | 0.000000 |
| H | 0.000000  | 2.482284  | 0.000000 |
| H | -2.149668 | 1.241129  | 0.000000 |
| H | -2.149668 | -1.241129 | 0.000000 |
| H | 0.000000  | -2.482284 | 0.000000 |
| H | 2.149668  | -1.241129 | 0.000000 |
| H | 2.149668  | 1.241129  | 0.000000 |

Energy = -232.2582139 Hartree

Low Frequencies (cm<sup>-1</sup>): 413.990 413.990 621.137 621.137 692.201 718.115

**(c) Coronene (3)**

| Atom | X         | Y         | Z        |
|------|-----------|-----------|----------|
| C    | 1.248268  | 3.534175  | 0.000000 |
| C    | 0.000000  | 2.848853  | 0.000000 |
| C    | 0.000000  | 1.427452  | 0.000000 |
| C    | 1.236210  | 0.713726  | 0.000000 |
| C    | 2.467179  | 1.424426  | 0.000000 |
| C    | 2.436551  | 2.848120  | 0.000000 |
| C    | -1.236210 | 0.713726  | 0.000000 |
| C    | 1.236210  | -0.713726 | 0.000000 |
| C    | 0.000000  | -1.427452 | 0.000000 |
| C    | -1.236210 | -0.713726 | 0.000000 |
| C    | 0.000000  | -2.848853 | 0.000000 |
| C    | 1.248268  | -3.534175 | 0.000000 |

|   |           |           |          |
|---|-----------|-----------|----------|
| C | 2.436551  | -2.848120 | 0.000000 |
| C | 2.467179  | -1.424426 | 0.000000 |
| C | 3.684820  | -0.686056 | 0.000000 |
| C | 3.684820  | 0.686056  | 0.000000 |
| H | 4.624605  | 1.231865  | 0.000000 |
| H | 4.624605  | -1.231865 | 0.000000 |
| H | 1.245477  | 4.620958  | 0.000000 |
| H | 3.379129  | 3.389093  | 0.000000 |
| H | 1.245477  | -4.620958 | 0.000000 |
| H | 3.379129  | -3.389093 | 0.000000 |
| C | -1.248268 | 3.534175  | 0.000000 |
| C | -2.436551 | 2.848120  | 0.000000 |
| C | -2.467179 | 1.424426  | 0.000000 |
| H | -1.245477 | 4.620958  | 0.000000 |
| H | -3.379129 | 3.389093  | 0.000000 |
| C | -3.684820 | 0.686056  | 0.000000 |
| C | -3.684820 | -0.686056 | 0.000000 |
| C | -2.467179 | -1.424426 | 0.000000 |
| H | -4.624605 | 1.231865  | 0.000000 |
| H | -4.624605 | -1.231865 | 0.000000 |
| C | -1.248268 | -3.534175 | 0.000000 |
| H | -1.245477 | -4.620958 | 0.000000 |
| C | -2.436551 | -2.848120 | 0.000000 |
| H | -3.379129 | -3.389093 | 0.000000 |

Energy = -921.9167349 Hartree

Low Frequencies (cm<sup>-1</sup>) : 90.278 90.278 129.725 167.010 231.250 302.631

2. TD-DFT results TBP (**1**), Benzene (**2**) and Coronene (**3**) at B3LYP/6-31+G(D,P) level of theory.

(a) **TBP molecule (1)**

Excited State 1: Singlet-A1 2.8820 eV 430.20 nm f=0.0232

HOMO-1 -> LUMO -0.28094

HOMO -> LUMO+1 0.64288

Excited State 2: Singlet-B2 3.0817 eV 402.32 nm f=0.3565

HOMO-1 -> LUMO+1 0.23049

HOMO -> LUMO 0.65719

Excited State 3: Singlet-A1 3.4681 eV 357.50 nm f=0.1398

HOMO-1 -> LUMO 0.63597

HOMO -> LUMO+1 0.27992

Excited State 4: Singlet-B2 3.6456 eV 340.09 nm f=0.4559

HOMO-1 -> LUMO+1 0.65408

HOMO -> LUMO -0.21881

Excited State 5: Singlet-A1 3.LUMO+147 eV 314.31 nm f=0.0027

HOMO-2 -> LUMO 0.32934

HOMO -> LUMO+2 0.60000

Excited State 6: Singlet-B2 3.9736 eV 312.02 nm f=0.0015

HOMO -> LUMO+3 0.66529

HOMO -> LUMO+4 -0.19656

Excited State 7: Singlet-B2 4.1342 eV 299.90 nm f=0.0108

HOMO-5 -> LUMO -0.24366

HOMO-2 -> LUMO+1 0.40064

HOMO-1 -> LUMO+2 0.29972

HOMO -> LUMO+3 -0.18337

HOMO -> LUMO+4 -0.37593

Excited State 8: Singlet-A1 4.2991 eV 288.39 nm f=0.0006

HOMO-4 -> LUMO+1 0.48788

HOMO-3 -> LUMO 0.26634

HOMO-2 -> LUMO 0.16759

HOMO-1 -> LUMO+4 -0.36942

HOMO -> LUMO+5 -0.10726

Excited State 9: Singlet-B2 4.3101 eV 287.66 nm f=0.0123

HOMO-4 -> LUMO 0.66581

HOMO-3 -> LUMO+1 -0.16653

Excited State 10: Singlet-A1 4.3806 eV 283.03 nm f=0.0033

HOMO-5 -> LUMO+1 0.16463

|                  |          |
|------------------|----------|
| HOMO-4 -> LUMO+1 | -0.22257 |
| HOMO-3 -> LUMO   | 0.45989  |
| HOMO-2 -> LUMO   | 0.24978  |
| HOMO-1 -> LUMO+3 | 0.23465  |
| HOMO -> LUMO+2   | -0.12234 |
| HOMO -> LUMO+5   | -0.25788 |

Excited State 11: Singlet-B2 4.3917 eV 282.31 nm f=0.0933

|                  |         |
|------------------|---------|
| HOMO-5 -> LUMO   | 0.14261 |
| HOMO-2 -> LUMO+1 | 0.39444 |
| HOMO-1 -> LUMO+2 | 0.25497 |
| HOMO -> LUMO+4   | 0.48324 |

Excited State 12: Singlet-A1 4.4370 eV 279.43 nm f=0.0133

|                  |          |
|------------------|----------|
| HOMO-5 -> LUMO+1 | 0.14040  |
| HOMO-3 -> LUMO   | -0.37478 |
| HOMO-2 -> LUMO   | 0.47152  |
| HOMO-1 -> LUMO+4 | -0.14687 |
| HOMO -> LUMO+2   | -0.27952 |

Excited State 13: Singlet-B2 4.4692 eV 277.42 nm f=0.0001

|                  |          |
|------------------|----------|
| HOMO-4 -> LUMO   | 0.13159  |
| HOMO-3 -> LUMO+1 | 0.66303  |
| HOMO -> LUMO+4   | -0.12018 |

Excited State 14: Singlet-A1 4.6314 eV 267.70 nm f=0.0000

|                  |          |
|------------------|----------|
| HOMO-5 -> LUMO+1 | 0.12605  |
| HOMO-4 -> LUMO+1 | 0.16689  |
| HOMO-3 -> LUMO   | 0.19560  |
| HOMO-1 -> LUMO+3 | 0.21776  |
| HOMO-1 -> LUMO+4 | -0.13056 |
| HOMO -> LUMO+5   | 0.58460  |

Excited State 15: Singlet-B2 4.6888 eV 264.43 nm f=0.4757

|                  |          |
|------------------|----------|
| HOMO-5 -> LUMO   | 0.51151  |
| HOMO-6 -> LUMO+1 | -0.17042 |
| HOMO-1 -> LUMO+2 | 0.38727  |
| HOMO -> LUMO+4   | -0.19661 |

Excited State 16: Singlet-B2 4.7180 eV 262.79 nm f=0.6487

|                  |          |
|------------------|----------|
| HOMO-5 -> LUMO   | -0.36381 |
| HOMO-4 -> LUMO   | 0.15633  |
| HOMO-2 -> LUMO+1 | -0.33775 |
| HOMO-1 -> LUMO+2 | 0.40967  |
| HOMO -> LUMO+4   | 0.12584  |

Excited State 17: Singlet-A1 4.7286 eV 262.20 nm f=0.0003

|                  |         |
|------------------|---------|
| HOMO-5 -> LUMO+1 | 0.58567 |
| HOMO-1 -> LUMO+4 | 0.34452 |

Excited State 18: Singlet-B1 4.79LUMO+3 eV 258.32 nm f=0.0000

|                |         |
|----------------|---------|
| HOMO -> LUMO+6 | 0.60827 |
|----------------|---------|

HOMO ->LUMO+8 -0.33912

Excited State 19: Singlet-A1 4.8404 eV 256.15 nm f=0.1663

HOMO-5 -> LUMO+1 -0.11249

HOMO-4 -> LUMO+1 0.32856

HOMO-1 -> LUMO+3 0.46442

HOMO-1 -> LUMO+4 0.34062

HOMO -> LUMO+5 -0.13957

Excited State 20: Singlet-B1 4.LUMO+275 eV 250.10 nm f=0.0013

HOMO -> LUMO+6 0.34257

HOMO ->LUMO+8 0.60568

Excited State 21: Singlet-A2 4.LUMO+459 eV 249.17 nm f=0.0000

HOMO-1 -> LUMO+6 -0.12107

HOMO ->LUMO+7 0.68941

HOMO ->LUMO+9 -0.10251

Excited State 22: Singlet-B2 5.1404 eV 241.20 nm f=0.0007

HOMO-6 -> LUMO 0.14317

HOMO-1 -> LUMO+5 0.62712

HOMO ->LUMO+12 -0.21370

Excited State 23: Singlet-A1 5.1584 eV 240.35 nm f=0.0278

HOMO-7 -> LUMO -0.13018

HOMO-4 -> LUMO+2 0.11290

HOMO-1 -> LUMO+4 -0.25871

HOMO ->LUMO+11 0.58627

Excited State 24: Singlet-A2 5.2026 eV 238.31 nm f=0.0000

HOMO-1 ->LUMO+8 -0.12999

HOMO ->LUMO+7 0.10780

HOMO ->LUMO+9 0.67687

Excited State 25: Singlet-A1 5.2047 eV 238.21 nm f=0.1068

HOMO-7 -> LUMO -0.10238

HOMO-6 -> LUMO+1 0.45590

HOMO-5 -> LUMO+1 -0.16943

HOMO-4 -> LUMO+1 -0.11023

HOMO-3 -> LUMO+3 -0.15967

HOMO-2 -> LUMO 0.14220

HOMO-2 -> LUMO+3 0.15260

HOMO-2 -> LUMO+4 0.94167

HOMO-1 -> LUMO+3 -0.94099

HOMO-1 -> LUMO+4 0.26443

HOMO -> LUMO+5 0.10749

HOMO ->LUMO+11 0.20860

Excited State 26: Singlet-B2 5.2461 eV 236.33 nm f=0.0053

HOMO-6 -> LUMO 0.51790

HOMO-1 -> LUMO+5 -0.25375

HOMO ->LUMO+12 -0.39240

Excited State 27: Singlet-B1 5.2LUMO+46 eV 234.04 nm f=0.0011

HOMO-1 ->LUMO+7 0.13035

HOMO ->LUMO+8 0.10116

HOMO ->LUMO+10 0.67456

Excited State 28: Singlet-A2 5.3766 eV 230.60 nm f=0.0000

HOMO-1 -> LUMO+6 0.66198

HOMO-1 ->LUMO+8 0.17922

HOMO ->LUMO+7 0.11923

Excited State 29: Singlet-A1 5.4083 eV 229.25 nm f=0.0355

HOMO-5 -> LUMO+2 -0.10704

HOMO-4 -> LUMO+2 0.46982

HOMO-3 -> LUMO+3 -0.15638

HOMO-2 -> LUMO+3 0.33224

HOMO-1 -> LUMO+4 -0.12108

HOMO-1 ->LUMO+12 -0.10193

HOMO ->LUMO+11 -0.24741

Excited State 30: Singlet-A1 5.4352 eV 228.11 nm f=0.0644

HOMO-6 -> LUMO+1 0.37446

HOMO-5 -> LUMO+1 0.13098

HOMO-5 -> LUMO+2 -0.24098

HOMO-2 -> LUMO+3 -0.32388

HOMO-2 -> LUMO+4 0.12961

HOMO-1 -> LUMO+3     0.10641  
HOMO-1 -> LUMO+4     -0.18653  
HOMO-1 ->LUMO+12     -0.17331

**(b) Benzene (2)**

Excited State 1:    Singlet   5.5348 eV   224.01 nm   f=0.0000

HOMO-1 -> LUMO     0.49980

HOMO -> LUMO+1     0.49980

Excited State 2:    Singlet   6.3020 eV   196.74 nm   f=0.0000

HOMO-1 -> LUMO+1   -0.49832

HOMO -> LUMO        0.49832

Excited State 3:    Singlet   7.3644 eV   168.36 nm   f=0.5583

HOMO-1 -> LUMO+1    0.49801

HOMO -> LUMO        0.49801

Excited State 4:    Singlet   7.3644 eV   168.36 nm   f=0.5583

HOMO-1 -> LUMO     0.49801

HOMO -> LUMO+1     -0.49801

Excited State 5:    Singlet   7.8323 eV   158.30 nm   f=0.0000

HOMO-3 -> LUMO+1 -0.49855

HOMO-2 -> LUMO 0.49855

Excited State 6: Singlet 7.9397 eV 156.16 nm f=0.0000

HOMO-3 -> LUMO -0.49875

HOMO-2 -> LUMO+1 0.49877

Excited state symmetry could not be determined.

Excited State 7: Singlet 7.9397 eV 156.16 nm f=0.0000

HOMO-3 -> LUMO+1 0.49877

HOMO-2 -> LUMO 0.49876

Excited State 8: Singlet 7.9543 eV 155.87 nm f=0.0060

HOMO-3 -> LUMO 0.49915

HOMO-2 -> LUMO+1 0.49912

Excited State 9: Singlet 8.0908 eV 153.24 nm f=0.0000

HOMO -> LUMO+2 0.70509

Excited State 10: Singlet 8.0909 eV 153.24 nm f=0.0000

HOMO-1 -> LUMO+2 0.70509

**(c) Coronene (3)**

Excited State 1: Singlet 3.1548 eV 393.00 nm f=0.0000

HOMO-1 -> LUMO 0.50076

HOMO -> LUMO+1 0.49693

Excited State 2: Singlet 3.3454 eV 370.62 nm f=0.0389

HOMO-1 -> LUMO+1 -0.37586

HOMO -> LUMO 0.59701

Excited State 3: Singlet 4.0872 eV 303.35 nm f=0.6620

HOMO-3 -> LUMO+2 0.10486

HOMO-2 -> LUMO+3 -0.10290

HOMO-1 -> LUMO -0.48250

HOMO -> LUMO+1 0.48527

Excited State 4: Singlet 4.1294 eV 300.25 nm f=0.6213

HOMO-2 -> LUMO+2 0.11062

HOMO-1 -> LUMO+1 0.58419

HOMO -> LUMO 0.35919

Excited State 5: Singlet 4.1467 eV 298.99 nm f=0.0000

HOMO-2 -> LUMO 0.15925

HOMO -> LUMO+2 0.68124

Excited State 6: Singlet 4.2628 eV 290.85 nm f=0.0000  
HOMO-3 -> LUMO -0.30378  
HOMO-2 -> LUMO+1 -0.14869  
HOMO-1 -> LUMO+2 0.30443  
HOMO -> LUMO+3 0.52712

Excited State 7: Singlet 4.3731 eV 283.52 nm f=0.0000  
HOMO-2 -> LUMO 0.59940  
HOMO-1 -> LUMO+3 -0.32758  
HOMO -> LUMO+2 -0.14406

Excited State 8: Singlet 4.3824 eV 282.91 nm f=0.0000  
HOMO-3 -> LUMO 0.24536  
HOMO-2 -> LUMO+1 -0.31417  
HOMO-1 -> LUMO+2 0.51935  
HOMO -> LUMO+3 -0.25796

Excited State 9: Singlet 4.4810 eV 276.69 nm f=0.0000  
HOMO-3 -> LUMO+1 0.26092  
HOMO-2 -> LUMO 0.30930  
HOMO-1 -> LUMO+3 0.57114

Excited State 10: Singlet 4.5919 eV 270.00 nm f=0.0000  
HOMO-3 -> LUMO 0.47264  
HOMO-2 -> LUMO+1 0.37989  
HOMO-1 -> LUMO+2 0.15994

HOMO -> LUMO+3

0.29708
